# Supplementary material for: Presenilin 1 transgene addition to amyloid precursor protein overexpressing transgenic rats increases amyloid beta 42 levels and results in loss of memory retention
Source: BMC Neurosci. 2016 Jul 7;17:46. doi: 10.1186/s12868-016-0281-8 (PMC4936262; doi:10.1186/s12868-016-0281-8)
Supplement: Supplementary file 3 — 10.1186/s12868-016-0281-8 contains dataset for Barnes maze (see Fig. 4). The table includes acquisition day 1, 2 and 3 latency and errors and their averages, retention latency and errors and reversal days 1, 2 and 3 latency and errors and their averages. [file 12868_2016_281_MOESM3_ESM.xlsx]

## Sheet: Sheet1
Genotype	Acquisition Day1 Errors	Acquisition Day1 Latency	Acquisition Day2 Errors	Acquisition Day2 Latency	Acquisition Day3 Errors	Acquisition Day3 Latency	Acquisition Errors	Acquisition Latency	Retention Errors	Retention Latency	Reversal Day1 Errors	Reversal Day1 Latency	Reversal Day2 Errors	Reversal Day2 Latency	Reversal Day3 Errors	Reversal Day3 Latency	Reversal Errors	Reversal Latency
PS1	0	11	10.5	36	32.5	157.5	14.3333	68.1667	35	225	9	52.5	13.5	300	22	300	14.8333	217.5
PS1	12	300	10	120.5	14	210	12	210.167	10	300	7.5	300	4.5	300	10.5	300	7.5	300
APP	8	85.5	4	157.5	19	300	10.3333	181	4	36.5	3	148.5	2.5	153.5	5	127.5	3.5	143.167
PS1	15.5	222	15	300	11	300	13.8333	274	4.5	300	6	300	3.5	300	8	240.5	5.83333	280.167
APP	12.5	88	5	30	10.5	69.5	9.33333	62.5	4	36.5	5.5	33	14.5	68	8.5	42	9.5	47.6667
WT	11	158.5	3.5	36.5	9	96	7.83333	97	2.5	21	1.5	8.5	5	60.5	3	22	3.16667	30.3333
APP	11.5	123	6.5	47.5	4	43	7.33333	71.1667	12	76	3	27.5	2	15.5	3	28	2.66667	23.6667
PS1	1	13.5	17	83	26	207.5	14.6667	101.333	9	69	11.5	126	19	185	13.5	76.5	14.6667	129.167
PS1	7.5	42	17.5	74	20.5	205	15.1667	107	34.5	296.5	24.5	300	20.5	187	22	300	22.3333	262.333
APP	17.5	164.5	28.5	102.5	14.5	100	20.1667	122.333	10.5	51.5	4.5	33.5	4.5	25	6.5	46	5.16667	34.8333
PS1	22	141	11	49.5	16.5	165	16.5	118.5	16	300	5	65.5	18.5	256	5	92	9.5	137.833
WT	10.5	50.5	20.5	71	10.5	60.5	13.8333	60.6667	12	33	5	35.5	6.5	22.5	14	53	8.5	37
WT	5	32	2.5	16	3	12	3.5	20	2.5	21.5	3.5	20	3.5	18.5	2.5	17.5	3.16667	18.6667
WT	1	20.5	6	22	7	39.5	4.66667	27.3333	2.5	21.5	14	92	25	179.5	13	165	17.3333	145.5
WT	1.5	26	5.5	44	6.5	42.5	4.5	37.5	4	20	2	31	7.5	69	4	28.5	4.5	42.8333
PS1	27.5	300	54	300	15	180	32.1667	260	5	59.5	3.5	62.5	2	17	2	17.5	2.5	32.3333
PS1	6.5	52.5	7	22	6.5	43	6.66667	39.1667	8.5	39	3	20	13	51.5	16.5	121.5	10.8333	64.3333
APP	21.5	144.5	9.5	47.5	5.5	31.5	12.1667	74.5	7	37	8	62	3	17.5	3.5	52.5	4.83333	44
WT	9	180	18.5	173	11.5	161	13	171.333	7.5	111	9.5	143.5	21.5	232.5	7.5	114	12.8333	163.333
WT	23.5	267	41.5	300	15	162.5	26.6667	243.167	11.5	87	15	204.5	28	243.5	8.5	124.5	17.1667	190.833
APP	2.5	31.5	7.5	37	0.5	6.5	3.5	25	4.5	21	7.5	51.5	3	12.5	0	11	3.5	25
PS1	6	27.5	8.5	34	19.5	190.5	11.3333	84	10	83.5	17	181	20.5	179	11	89.5	16.1667	149.833
APP	19	296	17	300	10	161	15.3333	252.333	25.5	265	15	261	34	279	11	141	20	227
APP	16	217.5	19	161.5	6	59.5	13.6667	146.167	2	15	3	25.5	5	29.5	4	25	4	26.6667
APP	1	16	7.5	134.5	3.5	300	4	150.167	2	36	2	300	3	166.5	1.5	300	2.16667	255.5
WT	11	185.5	11.5	158.5	4	28.5	8.83333	124.167	5.5	37	3.5	20	12.5	71	1	19.5	5.66667	36.8333
PS1	7	100	36.5	258	28	300	23.8333	219.333	37.5	280	22.5	226	14.5	246.5	21	300	19.3333	257.5
APP	17.5	167.5	17	160	6.5	86.5	13.6667	138	24.5	197	20.5	252.5	12	200	7	183.5	13.1667	212
WT	9.5	143.5	7.5	121	8	60	8.33333	108.167	26	221	8	168.5	12.5	251.5	5	92	8.5	170.667
WT	2.5	47	3.5	27.5	2	10	2.66667	28.1667	7.5	29.5	2.5	36	13	59.5	3.5	26.5	6.33333	40.6667
PS1	15.5	216.5	20	175	17	152	17.5	181.167	24	180.5	7	160	35.5	300	9	161	17.1667	207
APP	23	259	18	290	10.5	258.5	17.1667	269.167	7	181	7	54	7.5	265	3	56.5	5.83333	125.167
WT	10	80.5	14.5	137	7	74	10.5	97.1667	4.5	32.5	4.5	78	6.5	64	15	92	8.66667	78
WT	5	65	2.5	17	13.5	164	7	82	28.5	300	5	180.5	9	203.5	12.5	213.5	8.83333	199.167
PS1	9	149.5	3.5	30	4.5	32.5	5.66667	70.6667	5	25	5.5	49.5	4	36	4.5	30.5	4.66667	38.6667
